# Supplementary material for: High-confidence placement of low-occupancy fragments into electron density using the anomalous signal of sulfur and halogen atoms
Source: PubMed Central journal article supplement (PMC11154595; doi:10.1107/s2059798324004480), 2024-06-05
Supplement: d-80-00451-sup1.pdf [file d-80-00451-sup1.pdf]

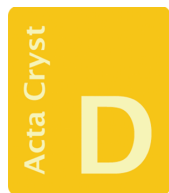

STRUCTURAL  
BIOLOGY

**Volume 80 (2024)**

**Supporting information for article:**

**High-confidence placement of low-occupancy fragments into electron density using the anomalous signal of sulfur and halogen atoms**

**Shumeng Ma, Shymaa Damfo, Matthew W. Bowler, Vitaliy Mykhaylyk and Frank Kozielski**

**Table S1** SMILES codes of fragment analogues and their parental fragment hits.

| Fragments | SMILES codes                           |
|-----------|----------------------------------------|
| 1E7       | <chem>NC1=CC(C=CS2)=C2C=C1</chem>      |
| 2E10      | <chem>O=C(C)NC1=CC(CCC2)=C2C=C1</chem> |
| 7G3       | <chem>O=C(O)CC1=CSC2=C1C=CC=C2</chem>  |
| 6A6       | <chem>NC1=NC(C=CC=C2)=C2S1</chem>      |
| 9D4       | <chem>NC1=NNC2=C1C(Cl)=CC=C2</chem>    |
| 11A7      | <chem>NC1=NC(C=CC(F)=C2)=C2S1</chem>   |
| 11A7_AL5  | <chem>NC1=NC2=CC=C(C=C2S1)I</chem>     |
| 11A7_AL6  | <chem>NC1=NC2=CC=C(C=C2S1)Br</chem>    |
| 7H2       | <chem>N[C@@H](C)C(C=C1)=CC=C1Cl</chem> |
| 7H2_AL1   | <chem>C[C@H](C1=CC=C(Br)C=C1)N</chem>  |
| 7H2_AL2   | <chem>C[C@H](C1=CC=C(I)C=C1)N</chem>   |

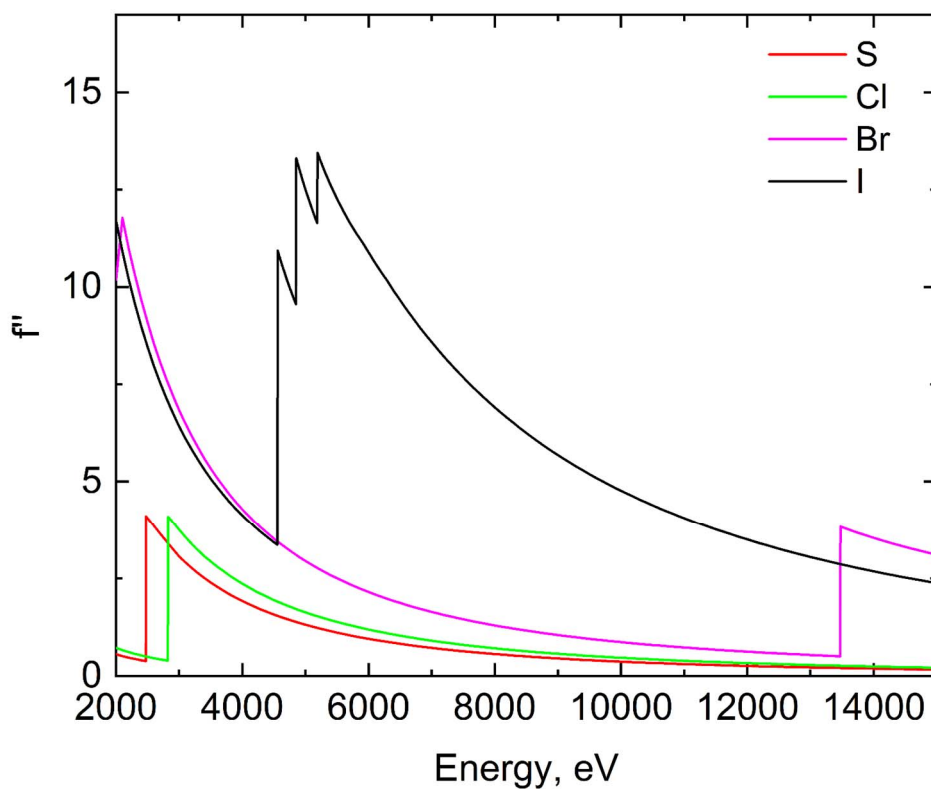

**Figure S1** Energy dependence of the anomalous contribution to the structural factor  $f''$  for ions monitored in this study (data from [www.bmsc.washington.edu](http://www.bmsc.washington.edu)). The value of  $f''$  manifests a sharp increase at the K-edge of S and Cl or L-edges of Br and I, enabling the identification of the ion position.

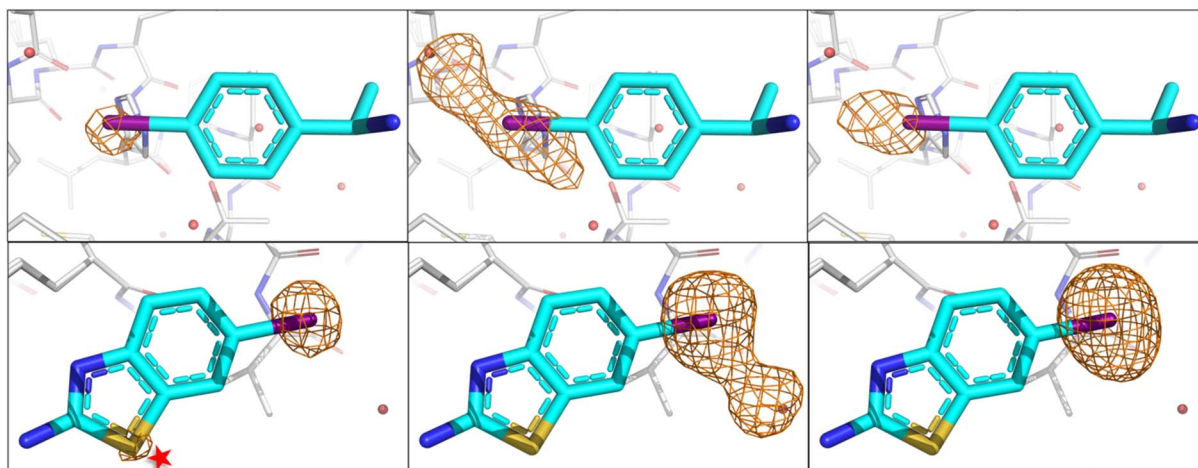

**Figure S2** Differences in anomalous difference Fourier maps of iodine-containing fragment analogues 7H2\_AL2 (**A-C**) and 11A7\_AL5 (**D-F**) collected at incident X-ray energies of 4.5 keV (**A** and **D**), 5.3 keV (**B** and **E**) and 9.0 keV (**C** and **F**). The anomalous difference Fourier maps (contoured at  $4\sigma$  level) are shown in orange. Anomalous peaks from the sulphur in 11A7\_AL5 are only visible in (**D**) for the 4.5 keV map (indicated by a red star) due to its low  $f''$  value at other two energies.

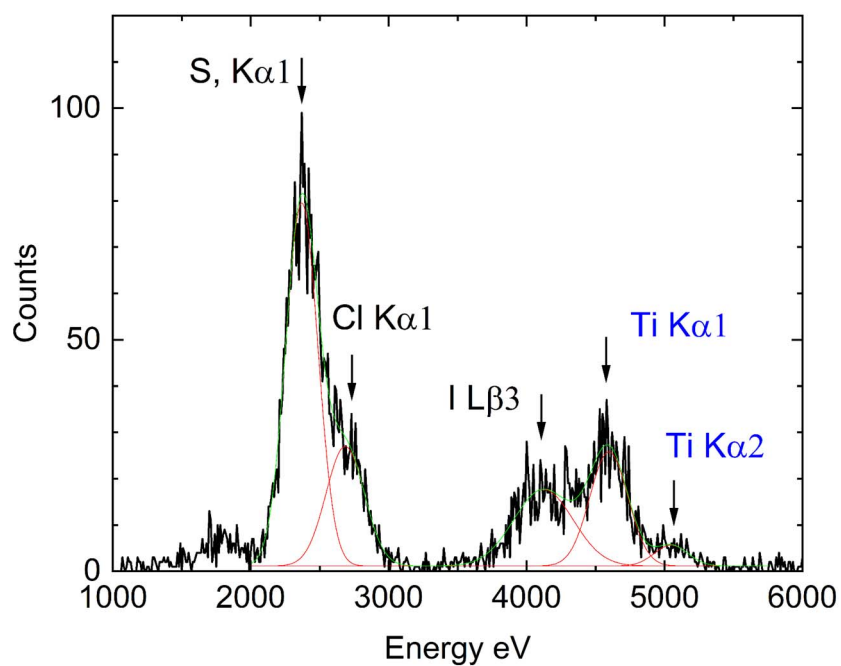

**Figure S3** X-ray fluorescence spectrum of the nsp1-11A7\_AL5 complex measured at 9 keV beam energy. The Ti K-lines are artefacts caused by a kapton cryo-loop which contained an admixture of titanium.
